# Supplementary material for: Plasma metabolic profiling after cortical spreading depression in a transgenic mouse model of hemiplegic migraine by capillary electrophoresis – mass spectrometry
Source: Royal Society of Chemistry journal article supplement (doi:10.1039/c5mb00049a), 2015-03-30
Supplement: c5mb00049a1.pdf [file c5mb00049a1.pdf]

## Supplementary Data

### Electronic Supplementary Information

**Fig. 1** Illustration of the experimental design. A. Mouse skull depicting the locations of KCl application (*i.e.*, occipital cortex) and DC-potential recordings (*i.e.*, frontal cortex). B. Induction of 7 CSDs by application of 1M KCl with a 5-min interval. At the end of the CSD induction, *ca.* 40  $\mu$ L of blood was collected from the mouse trunk. C. Specimen example traces recordings following application of 1M KCl (upper part) and 1M NaCl (lower part) in FHM1 R192Q and WT mice.

**Fig. 2** PCA score plot of the whole data set, including mice samples (labelled S, blue diamonds) and quality controls (labelled QC, red diamonds). The first two principal components cover 50% of the total variation.
