# Supplementary material for: Plasma metabolic profiling after cortical spreading depression in a transgenic mouse model of hemiplegic migraine by capillary electrophoresis – mass spectrometry
Source: Royal Society of Chemistry journal article supplement (doi:10.1039/c5mb00049a), 2015-03-30
Supplement: c5mb00049a2.pdf [file c5mb00049a2.pdf]

# Supplementary Figure 1
